# Supplementary material
Source: publisher figshare collection journal article supplement (https://diabetesjournals.figshare.com/ndownloader/files/27952980)
Supplement: Supplementary file 1 [file 27952980]

## Sheet: Sheet2
Symbol	Gene.Type	HTM.Basal_3h.avg	HTM.Low_3h.avg	HTM_Low_3h.t	HTM_Low_3h.p	HTM_Low_3h.FDR	HTM_Low_3h.logFC	HTM_Low_3h.FC	Description
1700020I14Rik	lincRNA	6.49	7.65	4.99	7.47e-06	0.00376	1.24	2.36	RIKEN cDNA 1700020I14 gene [Source:MGI Symbol;Acc:MGI:1913852]
Gm7061	processed_pseudogene	0.402	-1.69	-4.92	9.46e-06	0.0039	-2.4	-5.29	predicted gene 7061 [Source:MGI Symbol;Acc:MGI:3648315]
Gm26803	lincRNA	-1.54	0.442	4.84	1.26e-05	0.00422	2.62	6.13	predicted gene, 26803 [Source:MGI Symbol;Acc:MGI:5477297]
Gm28498	antisense	2.41	1.42	-4.68	2.13e-05	0.00469	-1.32	-2.5	predicted gene 28498 [Source:MGI Symbol;Acc:MGI:5579204]
Srrm4os	antisense	1.32	3.01	4.6	2.84e-05	0.00469	2.02	4.06	serine/arginine repetitive matrix 4, opposite strand [Source:MGI Symbol;Acc:MGI:1924048]
A330015K06Rik	antisense	1.61	2.92	4.55	3.35e-05	0.00469	1.23	2.35	RIKEN cDNA A330015K06 gene [Source:MGI Symbol;Acc:MGI:2443553]
Malat1	lincRNA	9.23	10.3	4.45	4.64e-05	0.00504	1.65	3.14	metastasis associated lung adenocarcinoma transcript 1 (non-coding RNA) [Source:MGI Symbol;Acc:MGI:1919539]
Pvt1	lincRNA	2.5	3.33	4.29	7.88e-05	0.00562	0.848	1.8	plasmacytoma variant translocation 1 [Source:MGI Symbol;Acc:MGI:97824]
D930016D06Rik	lincRNA	4.75	5.34	4.16	0.000123	0.0061	0.763	1.7	RIKEN cDNA D930016D06 gene [Source:MGI Symbol;Acc:MGI:2442700]
Gm38190	sense_intronic	1.71	3.39	4.14	0.00013	0.00623	1.9	3.73	predicted gene, 38190 [Source:MGI Symbol;Acc:MGI:5611418]
Gm5124	transcribed_processed_pseudogene	2.36	0.97	-4.12	0.000141	0.00645	-1.54	-2.92	predicted pseudogene 5124 [Source:MGI Symbol;Acc:MGI:3643622]
4930539J05Rik	antisense	-1.25	0.7	4.11	0.000145	0.00655	2.76	6.79	RIKEN cDNA 4930539J05 gene [Source:MGI Symbol;Acc:MGI:1922477]
A230056P14Rik	processed_transcript	4.21	5	4.05	0.000175	0.00705	0.756	1.69	RIKEN cDNA A230056P14 gene [Source:MGI Symbol;Acc:MGI:2444856]
Hyi	polymorphic_pseudogene	3.43	2.56	-4.04	0.000178	0.00706	-0.947	-1.93	hydroxypyruvate isomerase homolog (E. coli) [Source:MGI Symbol;Acc:MGI:1915430]
Gm11732	processed_transcript	0.268	-1.04	-4	0.000203	0.00736	-1.52	-2.87	predicted gene 11732 [Source:MGI Symbol;Acc:MGI:3652087]
Gm42664	sense_intronic	0.303	2.89	3.96	0.000231	0.00776	2.75	6.71	predicted gene 42664 [Source:MGI Symbol;Acc:MGI:5662801]
Gm13617	antisense	-0.482	-1.9	-3.96	0.000237	0.00784	-1.88	-3.67	predicted gene 13617 [Source:MGI Symbol;Acc:MGI:3650300]
BC029722	processed_transcript	5.16	4.55	-3.93	0.00026	0.00824	-0.835	-1.78	cDNA sequence BC029722 [Source:MGI Symbol;Acc:MGI:3584273]
B230354K17Rik	lincRNA	3.72	4.22	3.92	0.000262	0.00827	0.596	1.51	RIKEN cDNA B230354K17 gene [Source:MGI Symbol;Acc:MGI:2443272]
Gm37850	antisense	-0.738	1.03	3.9	0.000287	0.00849	2.19	4.56	predicted gene, 37850 [Source:MGI Symbol;Acc:MGI:5611078]
Gm15777	antisense	-0.421	1.54	3.89	0.000292	0.00851	2.08	4.23	predicted gene 15777 [Source:MGI Symbol;Acc:MGI:3783219]
Gm15893	antisense	-0.203	1.88	3.87	0.000307	0.0087	2.01	4.02	predicted gene 15893 [Source:MGI Symbol;Acc:MGI:3801832]
Gm22009	scaRNA	1.79	2.87	3.87	0.000316	0.00878	2.27	4.81	predicted gene, 22009 [Source:MGI Symbol;Acc:MGI:5451786]
Gm16185	antisense	1.89	3.92	3.85	0.000329	0.00893	1.78	3.44	predicted gene 16185 [Source:MGI Symbol;Acc:MGI:3802169]
Gm1976	lincRNA	3.06	3.77	3.85	0.000333	0.00898	0.884	1.85	predicted gene 1976 [Source:MGI Symbol;Acc:MGI:3780145]
Mir1898	miRNA	-0.716	0.928	3.82	0.000364	0.00915	2.23	4.69	microRNA 1898 [Source:MGI Symbol;Acc:MGI:3811421]
A730017L22Rik	processed_transcript	2.2	3.2	3.8	0.000384	0.00933	0.77	1.7	RIKEN cDNA A730017L22 gene [Source:MGI Symbol;Acc:MGI:3584452]
Gm17024	antisense	0.495	1.92	3.79	0.000402	0.00962	1.33	2.51	predicted gene 17024 [Source:MGI Symbol;Acc:MGI:4937851]
Tmem134	processed_transcript	0.309	-1.1	-3.76	0.000436	0.00997	-1.64	-3.13	transmembrane protein 134 [Source:MGI Symbol;Acc:MGI:1914240]
Gm26823	lincRNA	0.81	2.58	3.74	0.000462	0.0102	1.9	3.73	predicted gene, 26823 [Source:MGI Symbol;Acc:MGI:5477317]
1700080N15Rik	antisense	-0.824	1.19	3.74	0.000468	0.0103	2.28	4.87	RIKEN cDNA 1700080N15 gene [Source:MGI Symbol;Acc:MGI:1920739]
Gm15608	antisense	-1.5	-0.0879	3.72	0.0005	0.0106	1.88	3.67	predicted gene 15608 [Source:MGI Symbol;Acc:MGI:3801804]
Gm28119	sense_intronic	-1.99	0.336	3.69	0.000547	0.0109	2.63	6.19	predicted gene 28119 [Source:MGI Symbol;Acc:MGI:5578825]
NA	lincRNA	-0.0533	1.56	3.63	0.00066	0.0118	1.65	3.14	NA
Gdap10	lincRNA	-1.6	1.3	3.6	0.000729	0.0125	2.47	5.53	ganglioside-induced differentiation-associated-protein 10 [Source:MGI Symbol;Acc:MGI:1338008]
Gm17494	processed_transcript	2.18	2.7	3.59	0.000746	0.0126	0.79	1.73	predicted gene, 17494 [Source:MGI Symbol;Acc:MGI:4937128]
Kcnmb4os2	antisense	0.825	-0.63	-3.56	0.00082	0.0132	-1.37	-2.58	potassium large conductance calcium-activated channel, subfamily M, beta member 4, opposite strand 2 [Source:MGI Symbol;Acc:MGI:1918263]
1700125G02Rik	antisense	-0.3	1.04	3.55	0.000846	0.0133	1.47	2.77	RIKEN cDNA 1700125G02 gene [Source:MGI Symbol;Acc:MGI:1920878]
Gm26835	lincRNA	-1.77	0.879	3.54	0.000867	0.0135	2.79	6.92	predicted gene, 26835 [Source:MGI Symbol;Acc:MGI:5477329]
1700071M16Rik	antisense	0.551	1.79	3.53	0.000895	0.0137	1.29	2.44	RIKEN cDNA 1700071M16 gene [Source:MGI Symbol;Acc:MGI:1920754]
NA	lincRNA	3.4	4.03	3.52	0.000917	0.0139	0.697	1.62	NA
Gm37459	antisense	2.61	3.68	3.49	0.00101	0.0145	0.85	1.8	predicted gene, 37459 [Source:MGI Symbol;Acc:MGI:5610687]
Snhg14	processed_transcript	6.94	7.63	3.48	0.00103	0.0147	0.765	1.7	small nucleolar RNA host gene 14 [Source:MGI Symbol;Acc:MGI:1289201]
Fbxw23	transcribed_unprocessed_pseudogene	1.94	1.32	-3.47	0.00108	0.0151	-0.942	-1.92	F-box and WD-40 domain protein 23 [Source:MGI Symbol;Acc:MGI:3779686]
Gm10558	antisense	-1.19	0.0497	3.46	0.0011	0.0152	2.55	5.84	predicted gene 10558 [Source:MGI Symbol;Acc:MGI:3642906]
1810034E14Rik	antisense	-1.23	0.857	3.46	0.0011	0.0152	2.17	4.51	RIKEN cDNA 1810034E14 gene [Source:MGI Symbol;Acc:MGI:1913753]
Gm26809	lincRNA	1.63	2.51	3.44	0.00116	0.0157	1.15	2.22	predicted gene, 26809 [Source:MGI Symbol;Acc:MGI:5477303]
5330434G04Rik	lincRNA	3.5	4.03	3.44	0.00117	0.0157	0.703	1.63	RIKEN cDNA 5330434G04 gene [Source:MGI Symbol;Acc:MGI:1925519]
Gm25047	snRNA	0.475	1.64	3.44	0.00118	0.0158	1.17	2.25	predicted gene, 25047 [Source:MGI Symbol;Acc:MGI:5454824]
Gm26563	lincRNA	-1.77	-0.0913	3.42	0.00123	0.0161	2.13	4.36	predicted gene, 26563 [Source:MGI Symbol;Acc:MGI:5477057]
Gm25117	snoRNA	0.688	2.61	3.42	0.00124	0.0161	3.24	9.48	predicted gene, 25117 [Source:MGI Symbol;Acc:MGI:5454894]
H2-T10	polymorphic_pseudogene	0.539	-1.1	-3.41	0.00127	0.0164	-2.07	-4.19	histocompatibility 2, T region locus 10 [Source:MGI Symbol;Acc:MGI:95942]
Gm42672	processed_pseudogene	-2.55	-0.125	3.37	0.00144	0.0174	2.59	6.03	predicted gene 42672 [Source:MGI Symbol;Acc:MGI:5662809]
Gm22486	snoRNA	0.0554	0.97	3.37	0.00146	0.0175	1.73	3.32	predicted gene, 22486 [Source:MGI Symbol;Acc:MGI:5452263]
Gm12409	processed_transcript	-1.85	-0.349	3.35	0.00153	0.0179	1.86	3.64	predicted gene 12409 [Source:MGI Symbol;Acc:MGI:3649923]
Snord37	snoRNA	1.34	0.327	-3.35	0.00154	0.018	-1.24	-2.37	small nucleolar RNA, C/D box 37 [Source:MGI Symbol;Acc:MGI:3819530]
6330403K07Rik	lincRNA	9.33	8.68	-3.34	0.00156	0.0181	-0.67	-1.59	RIKEN cDNA 6330403K07 gene [Source:MGI Symbol;Acc:MGI:1918001]
Gm24455	snoRNA	-1.12	0.433	3.33	0.00164	0.0186	2.3	4.91	predicted gene, 24455 [Source:MGI Symbol;Acc:MGI:5454232]
1810026B05Rik	processed_transcript	1.74	2.74	3.33	0.00164	0.0186	1.02	2.02	RIKEN cDNA 1810026B05 gene [Source:MGI Symbol;Acc:MGI:1916420]
Snhg20	lincRNA	4.11	3.48	-3.32	0.00166	0.0186	-0.743	-1.67	small nucleolar RNA host gene 20 [Source:MGI Symbol;Acc:MGI:1924222]
Gm21984	processed_transcript	3.65	4.58	3.31	0.0017	0.0188	0.978	1.97	predicted gene 21984 [Source:MGI Symbol;Acc:MGI:5439453]
2610037D02Rik	lincRNA	-0.114	1.67	3.3	0.00176	0.0191	1.79	3.45	RIKEN cDNA 2610037D02 gene [Source:MGI Symbol;Acc:MGI:1917290]
Snord49a	snoRNA	5.19	7.58	3.29	0.00182	0.0195	4.26	19.1	small nucleolar RNA, C/D box 49A [Source:MGI Symbol;Acc:MGI:3819538]
BC002059	lincRNA	1.19	1.77	3.27	0.00194	0.0202	1.2	2.3	cDNA sequence BC002059 [Source:MGI Symbol;Acc:MGI:2384864]
Gm11223	processed_pseudogene	1.2	0.0434	-3.24	0.0021	0.0211	-1.78	-3.43	predicted gene 11223 [Source:MGI Symbol;Acc:MGI:3651631]
B130055M24Rik	processed_transcript	2.53	3.11	3.23	0.00215	0.0214	0.778	1.71	RIKEN cDNA B130055M24 gene [Source:MGI Symbol;Acc:MGI:3590645]
Lrp8os2	antisense	1.62	0.927	-3.22	0.00222	0.0216	-1.03	-2.05	low density lipoprotein receptor-related protein 8, apolipoprotein e receptor, opposite strand 2 [Source:MGI Symbol;Acc:MGI:3588233]
Gm16740	antisense	0.508	1.24	3.2	0.00238	0.0225	1.36	2.56	predicted gene, 16740 [Source:MGI Symbol;Acc:MGI:4439664]
Gm16617	lincRNA	-2.09	-0.508	3.2	0.00239	0.0225	2.07	4.2	predicted gene, 16617 [Source:MGI Symbol;Acc:MGI:4439541]
9330136K24Rik	lincRNA	0.67	1.49	3.18	0.00248	0.023	1.09	2.12	RIKEN cDNA 9330136K24 gene [Source:MGI Symbol;Acc:MGI:2442883]
A230001M10Rik	lincRNA	1.07	2.21	3.17	0.00256	0.0233	1.28	2.43	RIKEN cDNA A230001M10 gene [Source:MGI Symbol;Acc:MGI:2443043]
Gm16170	processed_transcript	-0.0388	1.31	3.17	0.0026	0.0236	1.29	2.45	predicted gene 16170 [Source:MGI Symbol;Acc:MGI:3805548]
B230369F24Rik	antisense	1.47	2.38	3.16	0.00267	0.024	0.722	1.65	RIKEN cDNA B230369F24 gene [Source:MGI Symbol;Acc:MGI:2443392]
NA	processed_transcript	0.996	2.21	3.15	0.00272	0.0242	1.41	2.65	NA
mt-Tg	Mt_tRNA	0.475	1.58	3.14	0.0028	0.0247	1.52	2.88	mitochondrially encoded tRNA glycine [Source:MGI Symbol;Acc:MGI:102486]
Gm20342	lincRNA	2.97	3.48	3.13	0.00291	0.0252	0.721	1.65	predicted gene, 20342 [Source:MGI Symbol;Acc:MGI:5012527]
Gm29083	antisense	-1.75	-0.277	3.13	0.00293	0.0253	1.94	3.84	predicted gene 29083 [Source:MGI Symbol;Acc:MGI:5579789]
Gm10649	processed_transcript	-0.264	0.755	3.12	0.00298	0.0255	1.45	2.73	predicted gene 10649 [Source:MGI Symbol;Acc:MGI:3642042]
Gm43111	sense_intronic	-0.385	0.777	3.11	0.00307	0.0258	2.21	4.63	predicted gene 43111 [Source:MGI Symbol;Acc:MGI:5663248]
Gm43140	antisense	0.379	1.52	3.11	0.00308	0.0259	1.42	2.68	predicted gene 43140 [Source:MGI Symbol;Acc:MGI:5663277]
Gm7539	processed_pseudogene	-1.92	-0.432	3.1	0.00311	0.0261	1.87	3.65	predicted gene 7539 [Source:MGI Symbol;Acc:MGI:3647619]
Gm36266	antisense	0.00506	-1.57	-3.1	0.00317	0.0263	-1.57	-2.96	predicted gene, 36266 [Source:MGI Symbol;Acc:MGI:5595425]
Gm16153	processed_transcript	2.21	2.81	3.1	0.00318	0.0264	0.721	1.65	predicted gene 16153 [Source:MGI Symbol;Acc:MGI:3802057]
Gm42659	sense_intronic	-1.23	-0.172	3.09	0.00321	0.0265	1.97	3.92	predicted gene 42659 [Source:MGI Symbol;Acc:MGI:5662796]
6720427I07Rik	lincRNA	2.65	3.22	3.09	0.00328	0.0269	0.976	1.97	RIKEN cDNA 6720427I07 gene [Source:MGI Symbol;Acc:MGI:1924398]
Gm42984	antisense	0.227	-0.791	-3.09	0.00328	0.0269	-1.76	-3.39	predicted gene 42984 [Source:MGI Symbol;Acc:MGI:5663121]
Gm4211	lincRNA	-0.0263	0.985	3.08	0.00333	0.0271	1.17	2.25	predicted gene 4211 [Source:MGI Symbol;Acc:MGI:3782387]
A330023F24Rik	processed_transcript	6.32	6.92	3.08	0.00333	0.0271	0.585	1.5	RIKEN cDNA A330023F24 gene [Source:MGI Symbol;Acc:MGI:2443958]
Gm13416	processed_pseudogene	-0.893	0.0557	3.08	0.00338	0.0273	1.75	3.37	predicted gene 13416 [Source:MGI Symbol;Acc:MGI:3652158]
9330132A10Rik	pseudogene	5.16	5.8	3.07	0.00342	0.0275	0.852	1.8	RIKEN cDNA 9330132A10 gene [Source:MGI Symbol;Acc:MGI:2442380]
Gm13848	lincRNA	-0.909	0.274	3.07	0.00344	0.0276	2.02	4.05	predicted gene 13848 [Source:MGI Symbol;Acc:MGI:3651996]
9430025C20Rik	pseudogene	0.767	1.77	3.06	0.00348	0.0278	1.12	2.17	RIKEN cDNA 9430025C20 gene [Source:MGI Symbol;Acc:MGI:3045277]
Mir124-2hg	lincRNA	5.76	6.29	3.05	0.00367	0.0287	0.783	1.72	Mir124-2 host gene (non-protein coding) [Source:MGI Symbol;Acc:MGI:1917691]
Vcp-rs	processed_pseudogene	1.27	0.438	-3.04	0.0037	0.0287	-0.964	-1.95	valosin containing protein, related sequence [Source:MGI Symbol;Acc:MGI:894298]
Gm12743	processed_transcript	-1.16	0.231	3.04	0.0037	0.0287	1.94	3.84	predicted gene 12743 [Source:MGI Symbol;Acc:MGI:3651449]
Gm18190	unprocessed_pseudogene	0.509	1.6	3.04	0.00378	0.0291	1.07	2.1	predicted gene, 18190 [Source:MGI Symbol;Acc:MGI:5010375]
2410021H03Rik	antisense	-1.67	0.584	3.02	0.00392	0.0298	2.72	6.57	RIKEN cDNA 2410021H03 gene [Source:MGI Symbol;Acc:MGI:1917000]
Gm10714	antisense	0.547	-0.89	-3.02	0.00393	0.0298	-1.39	-2.61	predicted gene 10714 [Source:MGI Symbol;Acc:MGI:3641975]
Gm26782	lincRNA	3.12	3.79	3.02	0.00394	0.0299	0.716	1.64	predicted gene, 26782 [Source:MGI Symbol;Acc:MGI:5477276]
Snord82	snoRNA	2.75	4.67	3.02	0.00398	0.03	4.03	16.4	small nucleolar RNA, C/D box 82 [Source:MGI Symbol;Acc:MGI:1931502]
Gm18588	processed_pseudogene	-0.406	0.776	3.01	0.00411	0.0304	1.33	2.52	predicted gene, 18588 [Source:MGI Symbol;Acc:MGI:5010773]
Gm25082	misc_RNA	-0.626	0.745	2.99	0.00428	0.031	1.49	2.81	predicted gene, 25082 [Source:MGI Symbol;Acc:MGI:5454859]
Gm8773	lincRNA	1.55	0.7	-2.99	0.00431	0.0312	-1.09	-2.14	predicted gene 8773 [Source:MGI Symbol;Acc:MGI:3646213]
A930029G22Rik	lincRNA	-1.67	-0.128	2.99	0.00433	0.0313	1.83	3.55	RIKEN cDNA A930029G22 gene [Source:MGI Symbol;Acc:MGI:3605039]
Gm12359	antisense	1.07	1.94	2.98	0.00446	0.0318	0.989	1.98	predicted gene 12359 [Source:MGI Symbol;Acc:MGI:3702436]
Gm25772	snRNA	-1.14	0.629	2.97	0.00448	0.0318	1.73	3.32	predicted gene, 25772 [Source:MGI Symbol;Acc:MGI:5455549]
Gm8995	unprocessed_pseudogene	0.198	1.13	2.95	0.00473	0.0329	1.31	2.48	predicted gene 8995 [Source:MGI Symbol;Acc:MGI:3644223]
Mir5125	miRNA	4.7	4.24	-2.94	0.00492	0.0338	-0.689	-1.61	microRNA 5125 [Source:MGI Symbol;Acc:MGI:4950450]
4930512B01Rik	antisense	1.19	1.94	2.94	0.00495	0.0339	0.847	1.8	RIKEN cDNA 4930512B01 gene [Source:MGI Symbol;Acc:MGI:1921974]
B230334C09Rik	antisense	4.96	5.87	2.93	0.00506	0.0343	0.91	1.88	RIKEN cDNA B230334C09 gene [Source:MGI Symbol;Acc:MGI:2442224]
5730405O15Rik	processed_transcript	-1.02	0.581	2.92	0.00523	0.0349	1.57	2.97	RIKEN cDNA 5730405O15 gene [Source:MGI Symbol;Acc:MGI:1917739]
Gm43696	sense_intronic	-1.82	0.0072	2.92	0.00525	0.035	2.09	4.25	predicted gene 43696 [Source:MGI Symbol;Acc:MGI:5663833]
Zbtb11os1	antisense	2.23	1.49	-2.92	0.00526	0.035	-0.807	-1.75	zinc finger and BTB domain containing 11, opposite strand 1 [Source:MGI Symbol;Acc:MGI:1913641]
2210008F06Rik	lincRNA	-0.591	-1.84	-2.91	0.0054	0.0356	-1.77	-3.41	RIKEN cDNA 2210008F06 gene [Source:MGI Symbol;Acc:MGI:1917307]
9230116N13Rik	processed_transcript	0.423	-0.256	-2.9	0.00543	0.0357	-1.1	-2.14	RIKEN cDNA 9230116N13 gene [Source:MGI Symbol;Acc:MGI:2443255]
Gm37814	sense_intronic	3.81	4.39	2.9	0.00544	0.0358	1.25	2.37	predicted gene, 37814 [Source:MGI Symbol;Acc:MGI:5611042]
Gm9581	processed_transcript	-2.7	0.62	2.9	0.00549	0.0359	2.75	6.74	predicted gene 9581 [Source:MGI Symbol;Acc:MGI:3779989]
NA	lincRNA	2.63	3.29	2.9	0.00549	0.0359	0.653	1.57	NA
C130083M11Rik	lincRNA	0.563	1.21	2.89	0.00573	0.0369	0.93	1.91	RIKEN cDNA C130083M11 gene [Source:MGI Symbol;Acc:MGI:3041216]
Rab26os	antisense	1.56	0.847	-2.88	0.00582	0.0373	-1.25	-2.38	RAB26, member RAS oncogene family, opposite strand [Source:MGI Symbol;Acc:MGI:1922864]
Gm5441	antisense	2.61	3.07	2.88	0.00584	0.0374	0.677	1.6	predicted gene 5441 [Source:MGI Symbol;Acc:MGI:3779489]
C530005A16Rik	processed_transcript	1.72	2.41	2.87	0.00599	0.038	0.663	1.58	RIKEN cDNA C530005A16 gene [Source:MGI Symbol;Acc:MGI:3612454]
Gm15246	processed_transcript	1.92	2.84	2.86	0.00611	0.0384	0.916	1.89	predicted gene 15246 [Source:MGI Symbol;Acc:MGI:3708120]
1110002J07Rik	lincRNA	-0.673	0.479	2.86	0.00621	0.0388	1.15	2.21	RIKEN cDNA 1110002J07 gene [Source:MGI Symbol;Acc:MGI:1915738]
Mir186	miRNA	0.798	1.67	2.84	0.00641	0.0396	1.12	2.17	microRNA 186 [Source:MGI Symbol;Acc:MGI:2676850]
Mir1198	miRNA	-0.266	-2.28	-2.84	0.00645	0.0398	-1.93	-3.8	microRNA 1198 [Source:MGI Symbol;Acc:MGI:3783371]
Gm42464	transcribed_processed_pseudogene	-1.99	-0.4	2.83	0.00658	0.0402	1.77	3.42	predicted gene 42464 [Source:MGI Symbol;Acc:MGI:5662601]
Srrm3os	antisense	-1.35	-0.189	2.83	0.00659	0.0403	1.86	3.62	serine/arginine repetitive matrix 3, opposite strand [Source:MGI Symbol;Acc:MGI:1918907]
1810010H24Rik	antisense	3.04	2.5	-2.83	0.00662	0.0404	-0.71	-1.64	RIKEN cDNA 1810010H24 gene [Source:MGI Symbol;Acc:MGI:1916316]
Rny1	misc_RNA	-1.57	0.207	2.83	0.00663	0.0404	2.76	6.79	RNA, Y1 small cytoplasmic, Ro-associated [Source:MGI Symbol;Acc:MGI:97995]
Mir153	miRNA	2.55	1.04	-2.82	0.00677	0.0409	-1.14	-2.21	microRNA 153 [Source:MGI Symbol;Acc:MGI:2676838]
Snord65	snoRNA	-0.551	0.801	2.82	0.00677	0.0409	1.9	3.74	small nucleolar RNA, C/D box 65 [Source:MGI Symbol;Acc:MGI:3819547]
2900052L18Rik	processed_transcript	1.63	0.99	-2.82	0.00684	0.0411	-0.914	-1.88	RIKEN cDNA 2900052L18 gene [Source:MGI Symbol;Acc:MGI:1924085]
Lincenc1	lincRNA	2.25	3.27	2.81	0.00705	0.0419	0.932	1.91	long intergenic non-coding RNA, embryonic stem cells expressed 1 [Source:MGI Symbol;Acc:MGI:3780541]
Gm11870	processed_pseudogene	-2.87	-1.16	2.8	0.00723	0.0426	1.93	3.81	predicted gene 11870 [Source:MGI Symbol;Acc:MGI:3650285]
C030034I22Rik	lincRNA	0.119	1.49	2.8	0.0073	0.0428	1.1	2.15	RIKEN cDNA C030034I22 gene [Source:MGI Symbol;Acc:MGI:1924783]
5830417I10Rik	unprocessed_pseudogene	2.62	3.01	2.79	0.00731	0.0428	0.638	1.56	RIKEN cDNA 5830417I10 gene [Source:MGI Symbol;Acc:MGI:1923272]
2610203C22Rik	processed_transcript	-0.624	0.221	2.78	0.00754	0.0437	1.34	2.54	RIKEN cDNA 2610203C22 gene [Source:MGI Symbol;Acc:MGI:1919731]
Gm12264	antisense	1.15	1.77	2.78	0.00765	0.0441	1.02	2.03	predicted gene 12264 [Source:MGI Symbol;Acc:MGI:3702404]
Snord104	snoRNA	-0.794	-2.55	-2.77	0.00779	0.0445	-2.15	-4.43	small nucleolar RNA, C/D box 104 [Source:MGI Symbol;Acc:MGI:3819515]
Gm17916	transcribed_processed_pseudogene	-0.709	1.02	2.77	0.00785	0.0447	1.09	2.13	predicted gene, 17916 [Source:MGI Symbol;Acc:MGI:5010101]
Mir709	miRNA	-0.837	-1.63	-2.77	0.00789	0.0448	-1.67	-3.18	microRNA 709 [Source:MGI Symbol;Acc:MGI:3629717]
Gm26786	lincRNA	0.903	1.79	2.76	0.00795	0.045	0.96	1.95	predicted gene, 26786 [Source:MGI Symbol;Acc:MGI:5477280]
Gm4524	antisense	0.833	0.0239	-2.76	0.00808	0.0455	-1.15	-2.22	predicted gene 4524 [Source:MGI Symbol;Acc:MGI:3782709]
Gm10602	pseudogene	-0.164	-1.12	-2.75	0.00816	0.0457	-1.49	-2.8	predicted gene 10602 [Source:MGI Symbol;Acc:MGI:3708759]
Gm5607	sense_overlapping	4.07	3.26	-2.73	0.00874	0.0478	-0.689	-1.61	predicted gene 5607 [Source:MGI Symbol;Acc:MGI:3645522]
4930480K15Rik	processed_transcript	1.44	2.14	2.73	0.00876	0.0478	1.24	2.37	RIKEN cDNA 4930480K15 gene [Source:MGI Symbol;Acc:MGI:1926050]
A230006K03Rik	lincRNA	1.38	2.22	2.72	0.00882	0.0481	0.807	1.75	RIKEN cDNA A230006K03 gene [Source:MGI Symbol;Acc:MGI:3644205]
Gm15675	lincRNA	-0.866	0.537	2.72	0.00887	0.0483	1.44	2.71	predicted gene 15675 [Source:MGI Symbol;Acc:MGI:3783117]
Gm10505	lincRNA	0.411	-0.916	-2.72	0.00895	0.0485	-1.12	-2.18	predicted gene 10505 [Source:MGI Symbol;Acc:MGI:3642687]
Gm6493	unprocessed_pseudogene	-1.04	0.229	2.71	0.00925	0.0495	1.5	2.82	predicted gene 6493 [Source:MGI Symbol;Acc:MGI:3644797]
Gm12439	processed_pseudogene	-1.99	-0.508	2.71	0.00925	0.0495	2	4.01	predicted gene 12439 [Source:MGI Symbol;Acc:MGI:3651708]
Gm12120	antisense	3.54	2.66	-2.7	0.00928	0.0496	-0.606	-1.52	predicted gene 12120 [Source:MGI Symbol;Acc:MGI:3651991]
Gm27010	lincRNA	-2.14	-0.521	2.7	0.00931	0.0496	1.8	3.48	predicted gene, 27010 [Source:MGI Symbol;Acc:MGI:5504125]
Gm26760	lincRNA	-2.38	-0.664	2.7	0.00942	0.05	1.67	3.19	predicted gene, 26760 [Source:MGI Symbol;Acc:MGI:5477254]
Kcnq1ot1	antisense	5.31	5.82	2.69	0.00972	0.0509	0.772	1.71	KCNQ1 overlapping transcript 1 [Source:MGI Symbol;Acc:MGI:1926855]
Gm2464	lincRNA	0.969	-0.575	-2.68	0.00989	0.0516	-1.2	-2.3	predicted gene 2464 [Source:MGI Symbol;Acc:MGI:3780631]
Gm9801	pseudogene	-2.55	-0.589	2.68	0.00991	0.0517	1.96	3.89	predicted gene 9801 [Source:MGI Symbol;Acc:MGI:3647139]
